# Supplementary material for: Teaching a difficult topic using a problem-based concept resembling a computer game: development and evaluation of an e-learning application for medical molecular genetics
Source: PubMed Central journal article supplement (PMC6813102; doi:10.1186/s12909-019-1817-2), 2019-10-24
Supplement: 12909_2019_1817_MOESM2_ESM.pdf [file 12909_2019_1817_MOESM2_ESM.pdf]

## Additional file 2: Pretest/posttest questions

Please respond briefly. If you do not know the answer, leave the question unanswered. The completion of this form should not take more than 5 minutes.

Your name/nick

---

Q1. What does the last pedigree symbol on the right stand for?

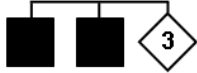

- a) the third pregnancy ended in abortion
  - b) three consequent spontaneous abortions
  - c) the daughter (third in order) is unaffected
  - d) the third sibling of unspecified gender is unaffected
  - e) three younger siblings of unspecified gender are unaffected
- 

Q2. Do you know any databases of genetic disorders? Please list their names.

---

Q3. How do you reveal the number of exons in the gene you decided to analyze?

---

Q4. How would you verify that the primer you designed does not bind to more loci in the genome?

---

Q5. A heterozygous missense mutation manifests in the sequence curve from Sanger sequencing as:

- a) two neighboring peaks of normal height
  - b) two overlapping peaks of approximately half height
  - c) missing of one peak in the position of the mutation
  - d) beginning of a section of the sequence curve with many overlapping peaks
  - e) extending the length of the sequence curve by one peak in the position of the mutation
- 

Q6. What does the expression p.(Gly480Cys) mean in molecular genetics?

---

Q7. What parameters or attributes of a genetic variant can give evidence for its negative influence on the expression of a gene and on its causality for the patient's affection?

---

Q8. What can a medical geneticist infer from multiple alignment of amino acid sequences of the protein studied from several animal species?

---

We ask you for your brief comment on the e-learning application. *(field not contained in pretest)*

Thank you for cooperation.
